# Supplementary material
Source: PubMed Central journal article supplement (PMC6395840)
Supplement: SMJ-60-62.pdf [file SMJ-60-62.pdf]

## SINGAPORE MEDICAL COUNCIL CATEGORY 3B CME PROGRAMME

(Code SMJ 201902A)

|                                                                                                                                                                                                            | True                     | False                    |
|------------------------------------------------------------------------------------------------------------------------------------------------------------------------------------------------------------|--------------------------|--------------------------|
| 1. There are eight touch points between birth and 4–6 years, according to the child health surveillance programme in Singapore.                                                                            | <input type="checkbox"/> | <input type="checkbox"/> |
| 2. The cut-offs indicated in the developmental checklist in the health booklet correspond to the 90th percentile norms.                                                                                    | <input type="checkbox"/> | <input type="checkbox"/> |
| 3. Adjustment of the developmental age is required for children born at 37 weeks.                                                                                                                          | <input type="checkbox"/> | <input type="checkbox"/> |
| 4. The developmental checklist in the health booklet is based on the Denver Developmental Screening Test, Singapore, which is the only screening tool that has been standardised for the local population. | <input type="checkbox"/> | <input type="checkbox"/> |
| 5. Babies have a startle reaction to sudden loud noises only after their hearing pathways are developed, which is after six weeks of age.                                                                  | <input type="checkbox"/> | <input type="checkbox"/> |
| 6. Lack of a social smile by eight weeks is a red flag.                                                                                                                                                    | <input type="checkbox"/> | <input type="checkbox"/> |
| 7. Unfisting of hands in babies is seen at around six months of age.                                                                                                                                       | <input type="checkbox"/> | <input type="checkbox"/> |
| 8. Mature pincer grasp occurs by the age of 12 months.                                                                                                                                                     | <input type="checkbox"/> | <input type="checkbox"/> |
| 9. Pointing to indicate needs occurs at around 18 months of age.                                                                                                                                           | <input type="checkbox"/> | <input type="checkbox"/> |
| 10. Inability to sit independently without support by six months is a red flag that warrants a specialist referral.                                                                                        | <input type="checkbox"/> | <input type="checkbox"/> |
| 11. A child should start speaking in sentences by two years of age.                                                                                                                                        | <input type="checkbox"/> | <input type="checkbox"/> |
| 12. No alphabet or number recognition by the age of five years is a red flag.                                                                                                                              | <input type="checkbox"/> | <input type="checkbox"/> |
| 13. A two-year-old child engaging in parallel play is a cause for concern and warrants further assessment.                                                                                                 | <input type="checkbox"/> | <input type="checkbox"/> |
| 14. Interactive play develops at around the age of three years.                                                                                                                                            | <input type="checkbox"/> | <input type="checkbox"/> |
| 15. If a child passes the newborn hearing screen, there is no need to assess hearing later.                                                                                                                | <input type="checkbox"/> | <input type="checkbox"/> |
| 16. If a child presents with fine motor delay, the evaluation should also include vision assessment, as vision and fine motor skills are interlinked.                                                      | <input type="checkbox"/> | <input type="checkbox"/> |
| 17. If a child's development occurs after the median age, but within the 90th percentile range, it warrants a specialist referral.                                                                         | <input type="checkbox"/> | <input type="checkbox"/> |
| 18. Poor sleep can impact child development.                                                                                                                                                               | <input type="checkbox"/> | <input type="checkbox"/> |
| 19. Parents' Evaluation of Developmental Status is a parent-completed developmental screening questionnaire.                                                                                               | <input type="checkbox"/> | <input type="checkbox"/> |
| 20. M-CHAT is a diagnostic assessment tool for autism spectrum disorder.                                                                                                                                   | <input type="checkbox"/> | <input type="checkbox"/> |

### Doctor's particulars:

Name in full: \_\_\_\_\_ MCR no.: \_\_\_\_\_  
 Specialty: \_\_\_\_\_ Email: \_\_\_\_\_

#### SUBMISSION INSTRUCTIONS:

Visit the SMJ website: <http://www.smj.org.sg/current-issue> and select the appropriate quiz. You will be redirected to the SMA login page.

**For SMA member:** (1) Log in with your username and password (if you do not know your password, please click on 'Forgot your password?'). (2) Select your answers for each quiz and click 'Submit'.

**For non-SMA member:** (1) Create an SMJ CME account, or login with your SMJ CME username and password (for returning users). (2) Make payment of SGD 21.40 (inclusive of 7% GST) via PayPal to access this month's quizzes. (3) Select your answers for each quiz and click 'Submit'.

#### RESULTS:

(1) Answers will be published online in the SMJ April 2019 issue. (2) The MCR numbers of successful candidates will be posted online at the SMJ website by 15 April 2019. (3) Passing mark is 60%. No mark will be deducted for incorrect answers. (4) The SMJ editorial office will submit the list of successful candidates to the Singapore Medical Council. (5) One CME point is awarded for successful candidates. (6) SMC credits CME points according to the month of publication of the CME article (i.e. points awarded for a quiz published in the December 2017 issue will be credited for the month of December 2017, even if the deadline is in January 2018).

**Deadline for submission: (February 2019 SMJ 3B CME programme): 12 noon, 7 April 2019.**
